# Supplementary material for: Controlling light emitting properties in bis(pyrenyl)-di-imines by tuning the chemical functionality of the spacer group
Source: Royal Society of Chemistry journal article supplement (doi:10.1039/d1me00079a), 2021-01-01
Supplement: d1me00079a1.pdf [file d1me00079a1.pdf]

## Controlling Light Emitting Properties in Bis(pyrenyl)-di-imines by Tuning Chemical Functionality of Spacer Group

Moyna Das<sup>[a]</sup>, Vishakha Jaswal<sup>[a]</sup>, Suwendu Maity<sup>[b,1]</sup>, Prasanta Ghosh<sup>[b]</sup> and Madhushree Sarkar<sup>\*[a]</sup>

<sup>[a]</sup>Department of Chemistry, Birla Institute of Technology and Science, Pilani, Pilani Campus, Rajasthan, India. Fax: +91-1596-244183; Tel: +91-1596-255679; E-mail: [msarkar@pilani.bits-pilani.ac.in](mailto:msarkar@pilani.bits-pilani.ac.in)

<sup>[b]</sup> Department of Chemistry, Narendrapur Ramakrishna Mission, Kolkata, West Bengal, India. E-mail: [ghosh@pghosh.in](mailto:ghosh@pghosh.in)

### SUPPORTING INFORMATION

#### INDEX

**Figure S1-S3:** IR, <sup>1</sup>H-NMR, and <sup>13</sup>C-NMR spectra of **L1**

**Figure S4-S6:** IR, <sup>1</sup>H-NMR, and <sup>13</sup>C-NMR spectra of **L2**

**Figure S7-S9:** IR, <sup>1</sup>H-NMR, and <sup>13</sup>C-NMR spectra of **L3**

**Figure S10-S13:** IR, <sup>1</sup>H-NMR, <sup>13</sup>C-NMR and HRMS of **L4**

**Figure S14-S17:** IR, <sup>1</sup>H-NMR, <sup>13</sup>C-NMR, and HRMS of **L5**

**Figure S18:** Illustrations of crystal structure of **L1**

**Figure S19:** Illustrations of crystal structures of literature reports on derivatives of pyrenes

**Figure S20:** UV-Visible spectra of **L2-L4**

**Figure S21-S22:** PL Spectra of **L2, L4** and **L5**

**Table S1:** Comparison of published melting points and the spectroscopy data with the compounds synthesized in the current work

## Experimental Details

### General

$^1\text{H}$  and  $^{13}\text{C}$  NMR spectra were recorded on a Bruker 400 MHz spectrometer. FTIR spectra were obtained from Shimadzu IRAffinity-1S system. Powder X-Ray Diffraction (XRD) data was collected using a Rigaku miniflex II,  $\lambda = 1.54 \text{ \AA}$ , Cu  $K\alpha$ . UV-Visible and fluorescence spectra were recorded on Jasco V-650 spectrophotometer and Fluorimax-4 0426C0809 respectively. Absolute quantum yield was measured by using quanta  $\phi$  instrument.

### Single Crystal XRD

The single-crystal XRD analysis of **L1** was done at Narendrapur Ramkrishna Mission, Kolkata, using a Bruker AXS D8 QUEST ECO diffractometer equipped with monochromatic Mo-target rotating anode X-ray and graphite monochromator  $\alpha$  radiation with  $\lambda = 0.71073 \text{ \AA}$  by  $\omega$  and  $\phi$  scan technique. The integrated diffraction data, unit cell, and data correction were performed using Bruker SAINT system, SMART, and SADABS respectively. The structure was solved by SHELXS-97 through the direct method and refined by full-matrix least-squares based on  $F^2$  through SHELXS-2018/3.<sup>1</sup> The hydrogen atoms were added at determined positions as riding atoms and non-H atoms were refined anisotropically.

### Synthesis of (1*E*,1'*E*)-*N,N'*-(1,4-phenylene)bis(1-(pyren-1-yl)methanimine) (**L1**)<sup>2</sup>

*p*-Phenylene diamine (0.270 g, 2.5 mmol) and catalytic amount of trifluoroacetic acid (TFA, 2-3 drops) were added to the solution of 1-pyrenecarboxaldehyde in dimethylacetamide (DMA) (1.15 g, 5 mmol). The mixture was refluxed for 24 hours. Bright yellow precipitate was removed by filtration and recrystallized from chloroform. Yield: 59%; Melting point: 315 - 316 °C; IR ( $\text{cm}^{-1}$ ): 3047 (w), 2360 (w),

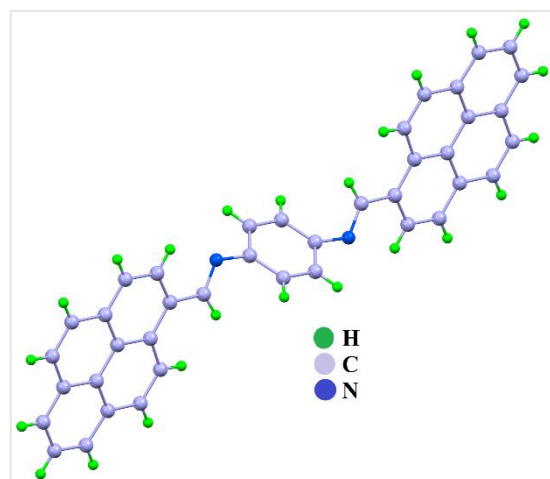

1597 (s), 1481 (m), 1203 (m), 964 (m), 895 (m), 849 (m), 763 (m), 710 (s), 610 (w), 502 (w) (Figure S1);  $^1\text{H}$  NMR (400MHz,  $\text{DMSO-}d_6$ )  $\delta$  ppm: 9.80 (2H, s, imine CH), 9.37 (2H, d,  $J = 9.4 \text{ Hz}$ , ArH), 8.88 (2H, d,  $J = 8.1 \text{ Hz}$ , ArH), 8.55 – 8.13 (14H, br, ArH), 7.71 (4H, s, ArH) (Figure S2);  $^{13}\text{C}$  NMR (100 MHz,  $\text{DMSO-}d_6$ )  $\delta$  ppm: 150.24, 133.43, 131.19, 130.56, 130.16,

130.15, 129.43, 128.59, 127.69, 127.65, 127.23, 126.87, 125.43, 125.30, 124.43, 124.36, 123.76, 123.38, 115.10 (Figure S3).

### Synthesis of (1*E*,2*E*)-1,2-bis(pyren-1-ylmethylene)hydrazine (L2)<sup>2</sup>

Hydrazine hydrate (0.121 mL, 2.5 mmol) was added dropwise to ethanolic solution of 1-pyrenecarboxaldehyde (1.15 g, 5 mmol), then catalytic amount of TFA (2-3 drops) was added to this solution. The mixture was refluxed for 24 hours. Pale yellow precipitate was removed by filtration and recrystallized from chloroform. Yield: 52%; Melting point: 308-309 °C; IR (cm<sup>-1</sup>): 3099 (w), 2360 (w), 1913 (w), 1597 (s), 1388 (w), 1311 (w),

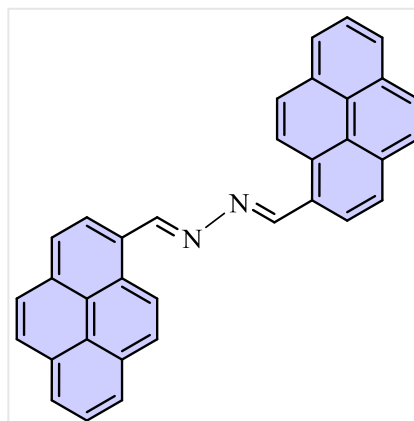

1242 (m), 1804 (m), 887 (w), 817 (s), 748 (m), 709 (m), 678 (w), 509 (m) (Figure S4); <sup>1</sup>H NMR (400 MHz, DMSO-*d*<sub>6</sub>) δ ppm: 9.94 (2H, s, imine CH), 9.30 (2H, d, *J* = 9.2 Hz, ArH), 8.86 (2H, d, *J* = 8.0 Hz, ArH), 8.53 – 8.42 (6H, m, ArH), 8.41 – 8.28 (6H, m, ArH), 8.19 (2H, t, *J* = 7.7 Hz, ArH) (Figure S5); <sup>13</sup>C NMR (100 MHz, DMSO-*d*<sub>6</sub>) δ ppm: 150.89, 133.19, 131.28, 130.65, 129.93, 129.84, 129.44, 128.55, 127.73, 127.51, 127.05, 126.69, 125.38, 124.99, 124.74, 124.46, 123.89 (Figure S6).

### Synthesis of (1*E*,1'*E*)-*N,N'*-(ethane-1,2-diyl)bis(1-(pyren-1-yl)methanimine) (L3)<sup>3</sup>

Ethylene diamine (0.167 mL, 2.5 mmol) was added dropwise to ethanolic solution of 1-pyrenecarboxaldehyde (1.15 g, 5 mmol) then catalytic amount of TFA (2-3 drops) was added to this solution. The mixture was refluxed for 24 hours. Dark orange precipitate was removed by filtration and recrystallized from chloroform. Yield: 48%; Melting point: 225 - 226 °C; IR (cm<sup>-1</sup>): 1627 (s), 1435 (w), 1242 (w), 1064 (w),

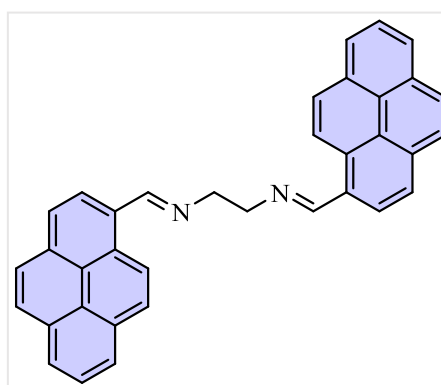

972 (w), 840 (s), 756 (m), 717 (m), 609 (m) (Figure S7); <sup>1</sup>H NMR (400 MHz, CDCl<sub>3</sub>) δ ppm: 9.35 (2H, s, imine CH), 8.71 (2H, d, *J* = 9.3 Hz, ArH), 8.54 (2H, d, *J* = 8.0 Hz, ArH), 8.23 – 7.77 (14H, m, ArH), 4.38 (4H, s, 2×CH<sub>2</sub>) (Figure S8); <sup>13</sup>C NMR (100 MHz, CDCl<sub>3</sub>) δ ppm: 162.43, 135.58, 131.43, 131.13, 130.99, 130.88, <sup>13</sup>C NMR (100 MHz, Chloroform-*d*) δ 162.43, 135.58, 131.43, 131.13, 130.99, 130.88,

130.75, 130.47, 127.47, 127.24, 127.09, 126.87, 126.60, 124.73, 124.59, 124.12, 123.07, 47.34 (Figure S9).

#### Synthesis of (1*E*,1'*E*)-*N,N'*-(butane-1,4-diyl)bis(1-(pyren-1-yl)methanimine) (L4)<sup>4</sup>

1,4-Diaminobutane (0.251 mL, 2.5 mmol) was added dropwise to ethanolic solution of 1-pyrenecarboxaldehyde (1.15 g, 5 mmol) then catalytic amount of TFA (2-3 drops) was added to this solution. The mixture was refluxed for 24 hours. Bright red precipitate was removed by filtration and recrystallized from chloroform. Yield: 54%; Melting point: 231-232 °C; IR (cm<sup>-1</sup>): 3741

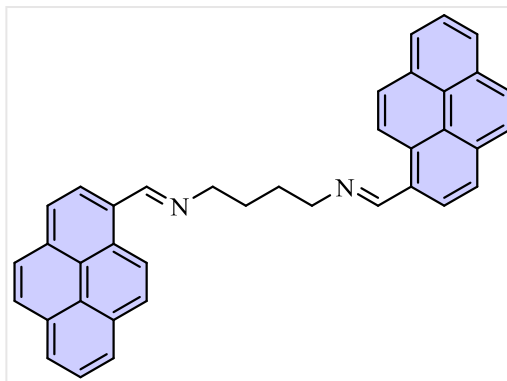

(w), 3039 (w), 2360 (w), 1743 (s), 1620(m), 1535 (w), 1458 (w), 1365 (w), 1234 (s), 1080 (s), 856 (s), 717 (m), 632 (m) (Figure S10); <sup>1</sup>H NMR (400 MHz, DMSO-*d*<sub>6</sub>) δ ppm: 9.45 (2H, s, imine CH), 9.12 (2H, d, *J* = 9.4 Hz, ArH), 8.58 (2H, d, *J* = 8.1 Hz, ArH), 8.39 – 8.19 (12H, m, ArH), 8.12 (2H, t, *J* = 7.6 Hz, ArH), 3.94 (4H, br, 2×CH<sub>2</sub>), 1.95 (4H, br, 2×CH<sub>2</sub>) (Figure 11); <sup>13</sup>C NMR (100 MHz, CDCl<sub>3</sub>) δ ppm: 159.79, 132.74, 131.29, 130.62, 128.82, 129.79, 128.58, 128.45, 127.47, 126.32, 126.07, 125.80, 125.56, 124.97, 124.88, 124.69, 122.65, 62.61, 29.16 (Figure S12); HRMS: *m/z* calcd for C<sub>38</sub>H<sub>28</sub>N<sub>2</sub> (M+H)<sup>+</sup> = 513.2325, found 513.2302 (Figure S13).

#### Synthesis of (1*E*,1'*E*)-*N,N'*-(hexane-1,6-diyl)bis(1-(pyren-1-yl)methanimine) (L5)<sup>4</sup>

Hexamethylene diamine (0.346 mL, 2.5 mmol) was added dropwise to ethanolic solution of 1-pyrenecarboxaldehyde (1.15 g, 5 mmol) then catalytic amount of TFA (2-3 drops) was added to this solution. The mixture was refluxed for 24 hours. Light yellow precipitate was removed by filtration and recrystallized from chloroform. Yield: 65%;

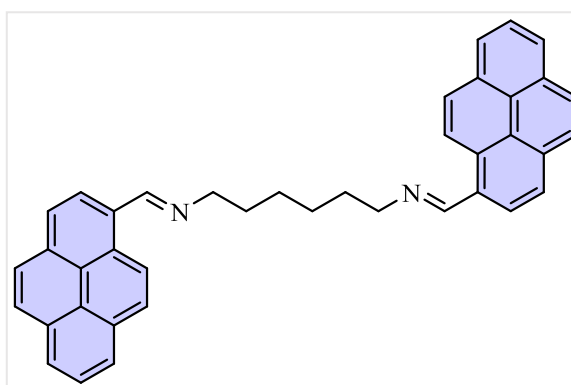

Melting point: 153-154 °C; IR (cm<sup>-1</sup>): 3039 (w), 2360 (m), 1627 (m), 1308 (w), 1242 (w), 1804 (w), 1026 (w), 848(s), 748 (m), 678 (w) (Figure S14); <sup>1</sup>H NMR (400 MHz, DMSO-*d*<sub>6</sub>) δ ppm: 9.39 (2H, s, imine CH), 9.11 (2H, d, *J* = 9.4 Hz, ArH), 8.53 (2H, d, *J* = 8.1 Hz, ArH), 8.43 – 8.15 (12H, br, ArH), 8.11 (2H, t, *J* = 7.6 Hz, ArH), 3.84 (4H, br, 2×CH<sub>2</sub>), 1.90 – 1.77

(4H, br, 2×CH<sub>2</sub>), 1.64 – 1.52 (4H, br, 2×CH<sub>2</sub>) (Figure S15); <sup>13</sup>C NMR (100 MHz, DMSO-*d*<sub>6</sub>) δ ppm: 160.17, 132.56, 131.25, 130.57, 129.57, 129.05, 129.01, 128.93, 127.84, 126.97, 126.86, 126.46, 126.14, 125.43, 124.48, 124.22, 123.47, 61.86, 31.19, 27.26 (Figure S16); HRMS: m/z calcd for C<sub>40</sub>H<sub>32</sub>N<sub>2</sub> (M+H)<sup>+</sup> = 541.2638, found 541.2615 (Figure S17).

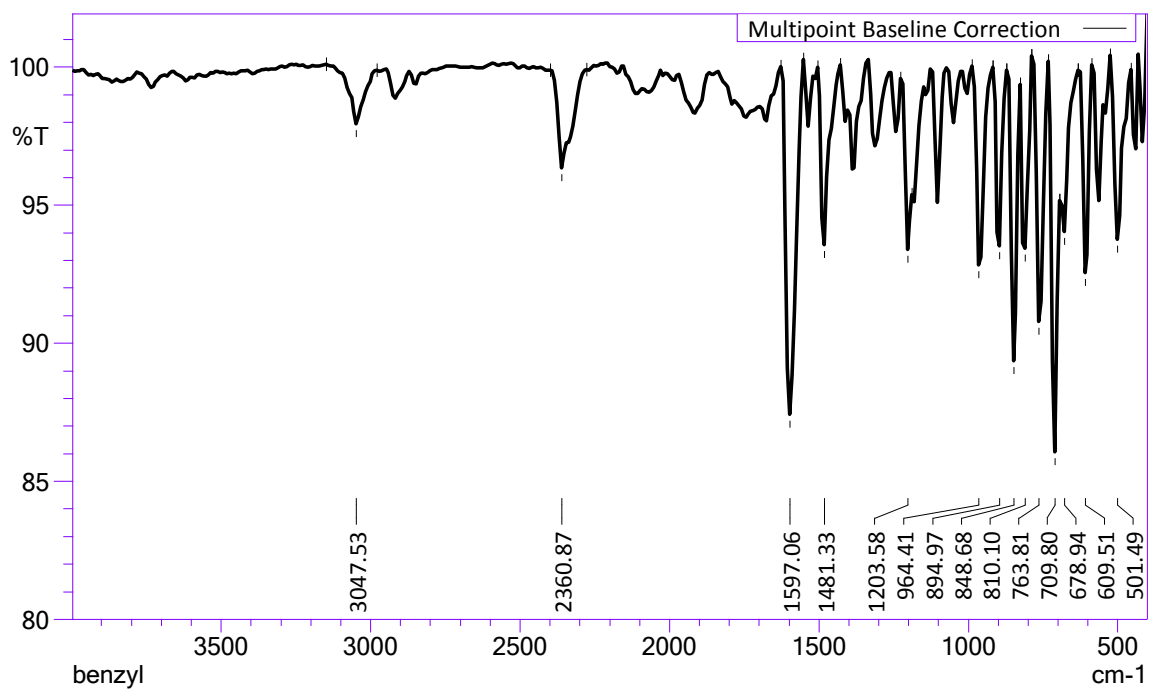

**Figure S1:** IR spectrum of **L1**

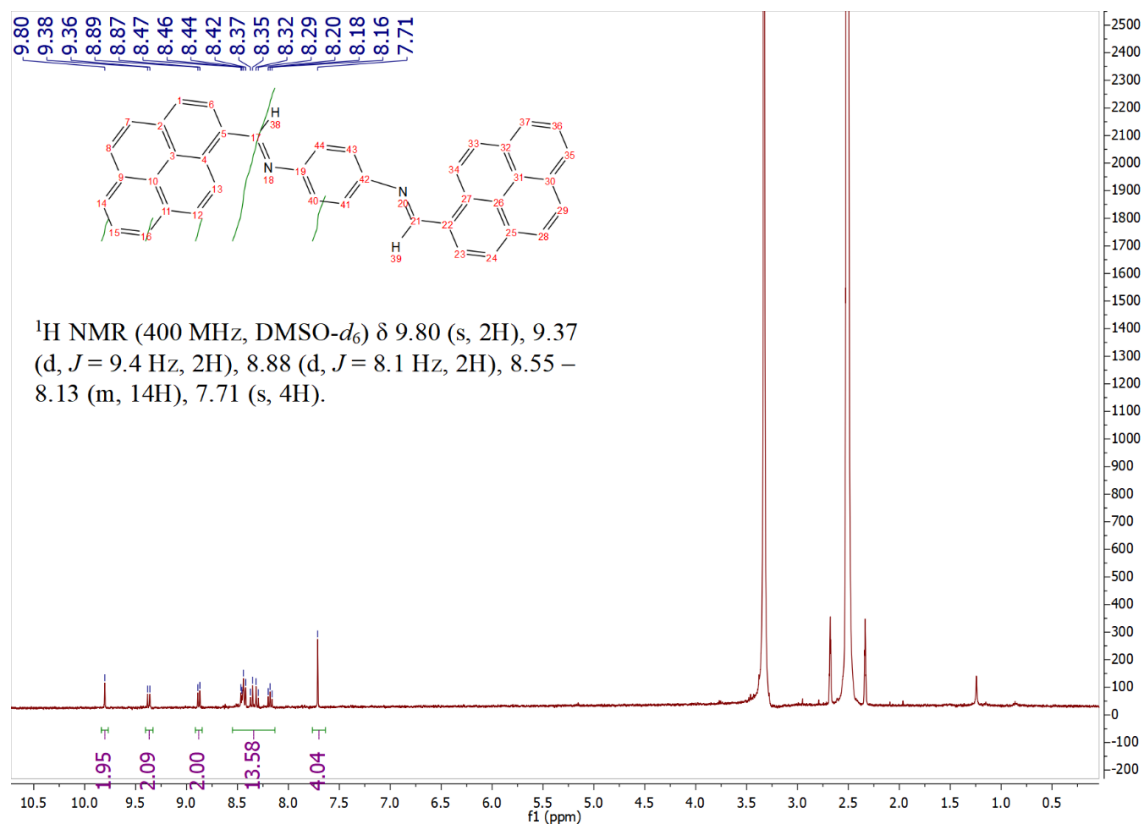

Figure S2: <sup>1</sup>H NMR spectrum of L1

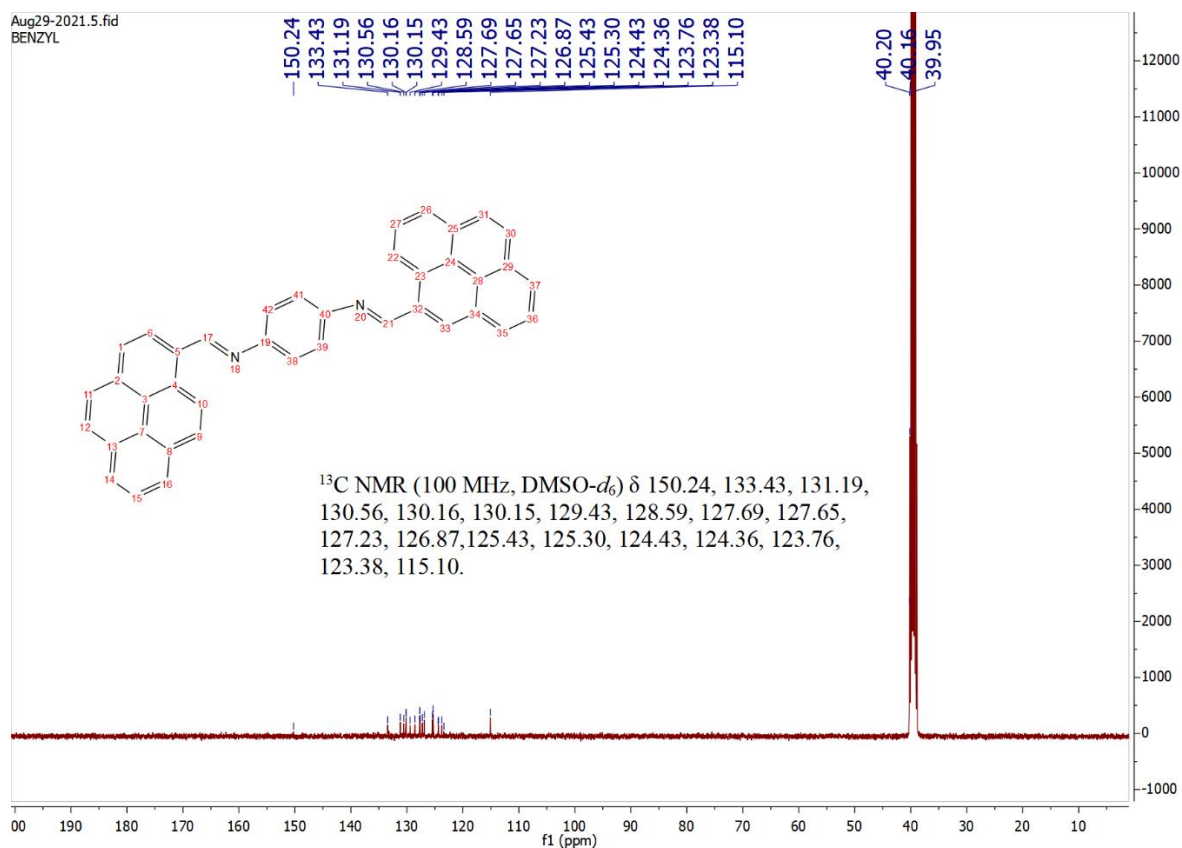

Figure S3: <sup>13</sup>C NMR spectrum of L1

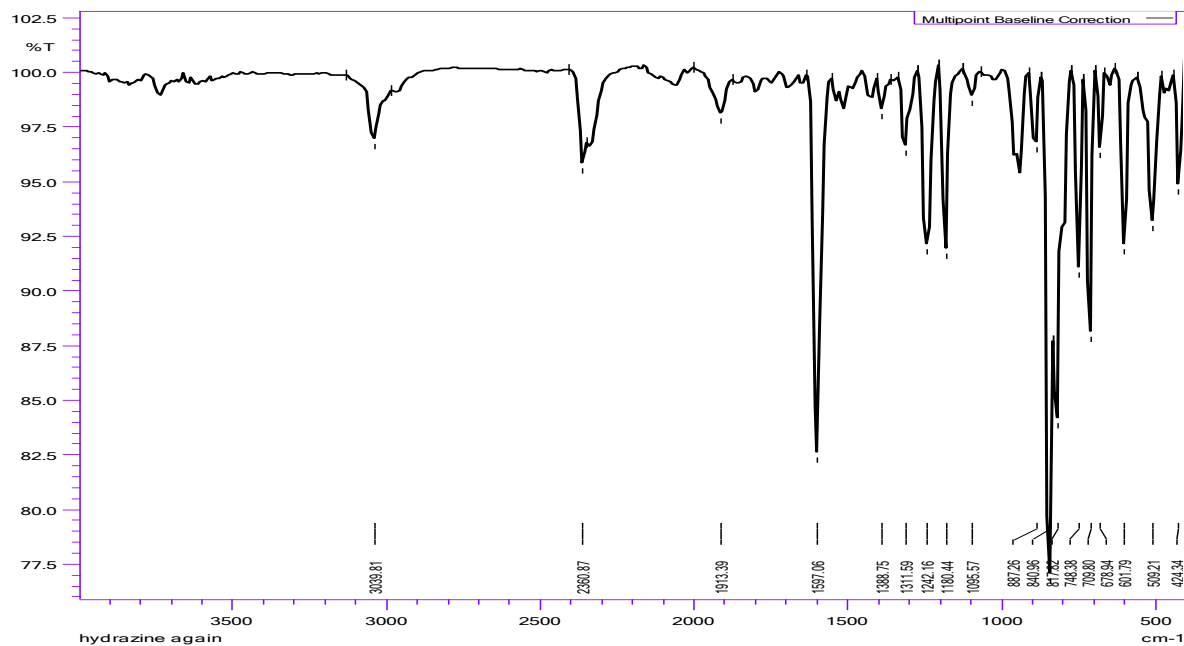

Figure S4: IR spectrum of L2

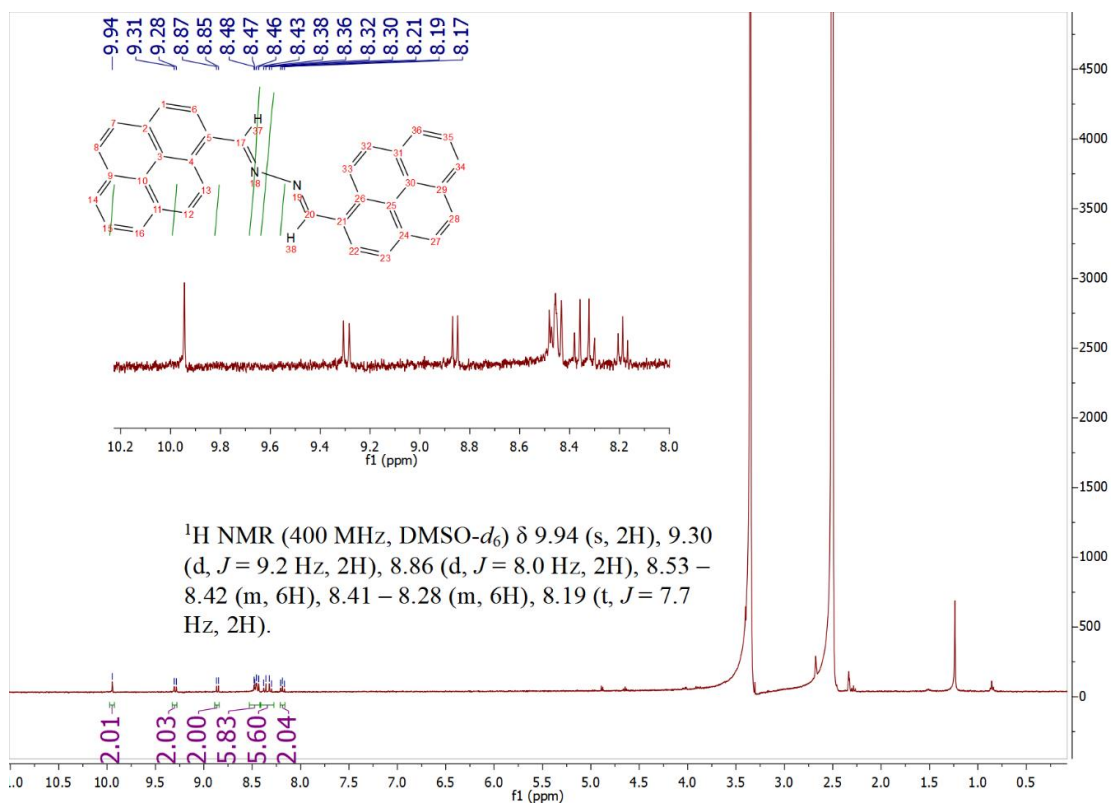

Figure S5: <sup>1</sup>H NMR spectrum of L2

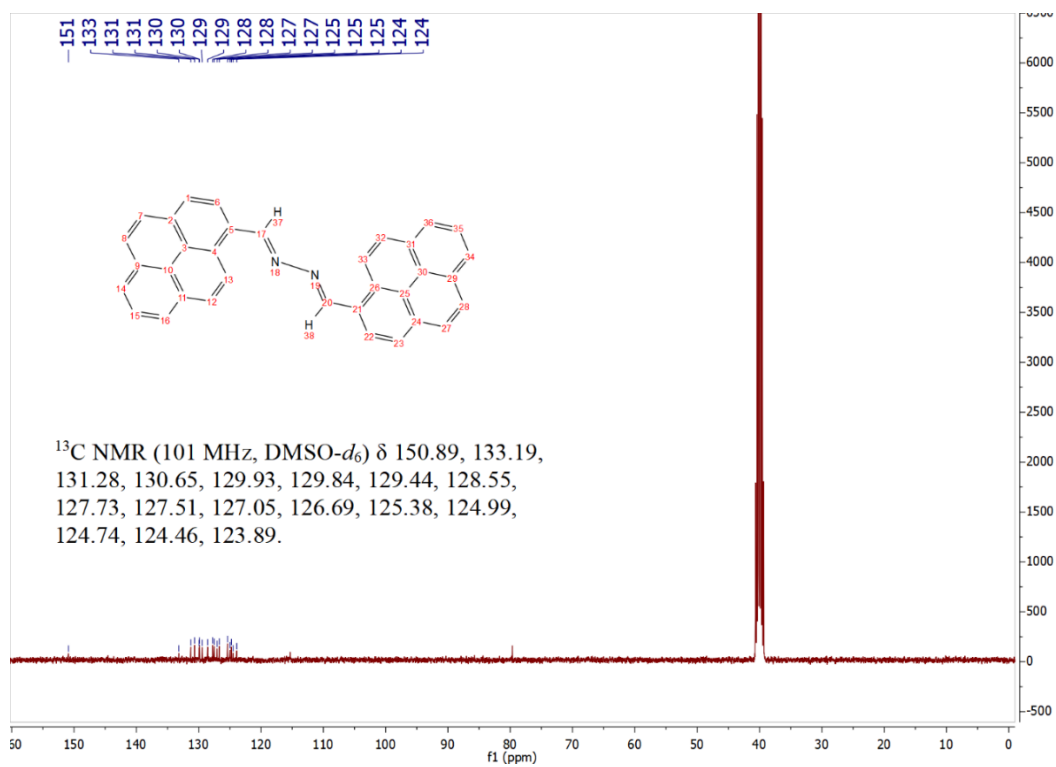

**Figure S6:** <sup>13</sup>C NMR spectrum of **L2**

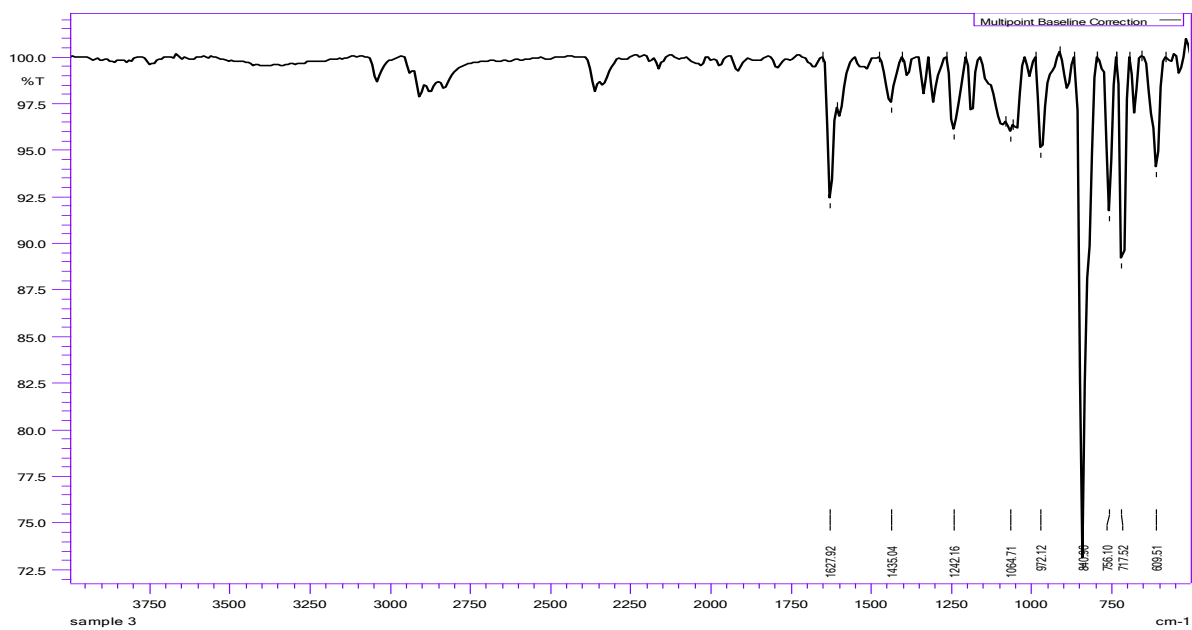

**Figure S7:** IR spectrum of **L3**



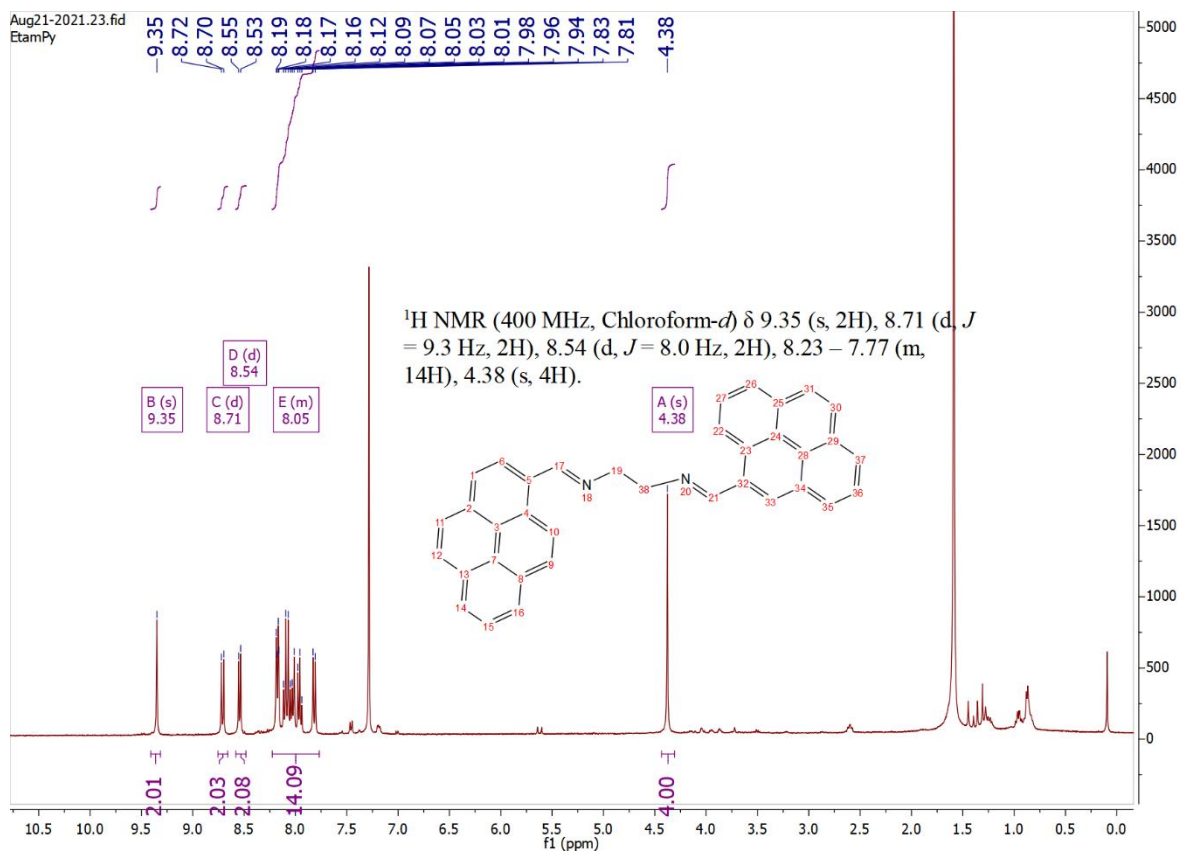

**Figure S8:**  $^1\text{H NMR}$  spectrum of L3

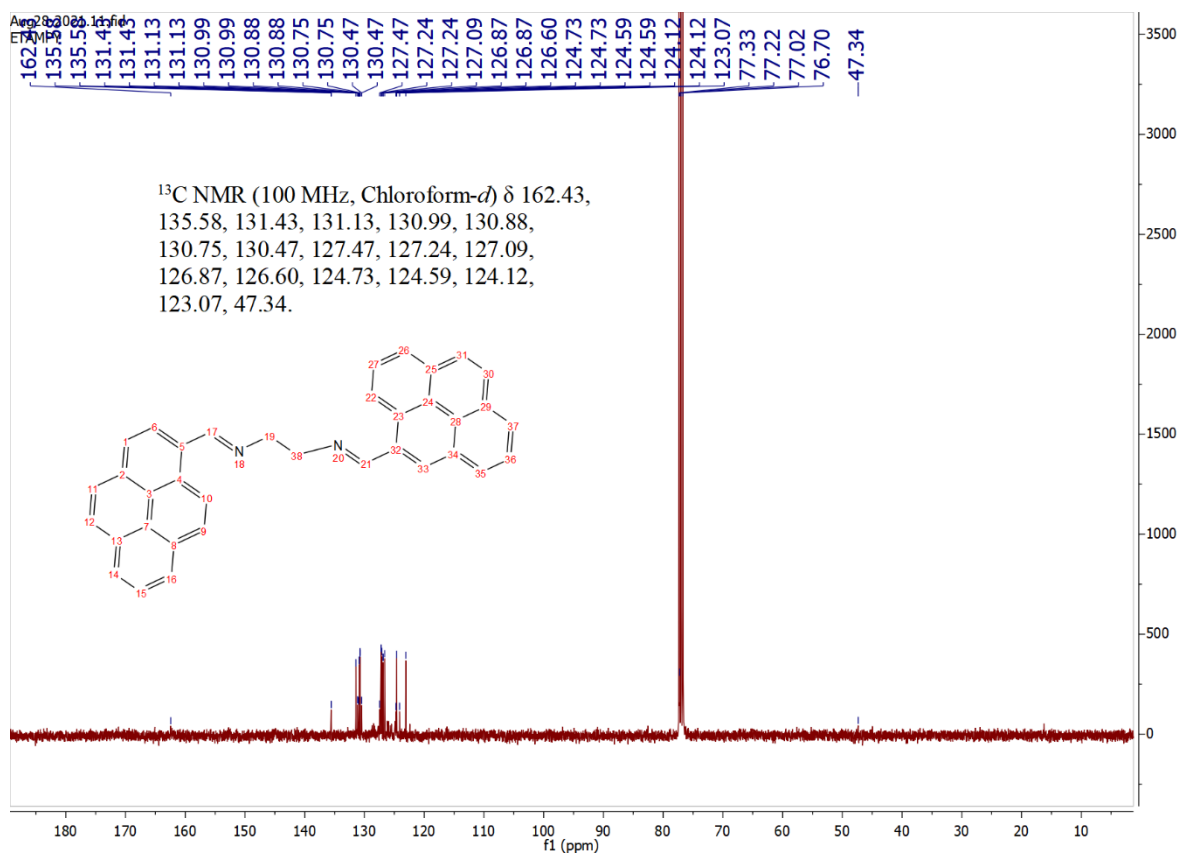

**Figure S9:**  $^{13}\text{C NMR}$  spectrum of L3

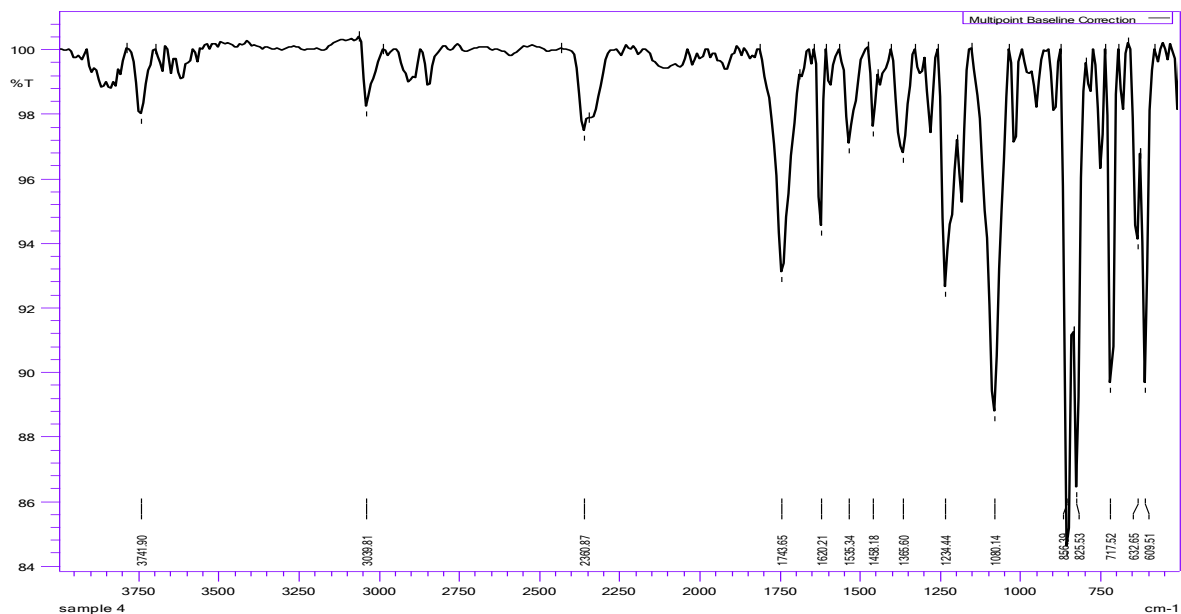

Figure S10: IR spectrum of L4

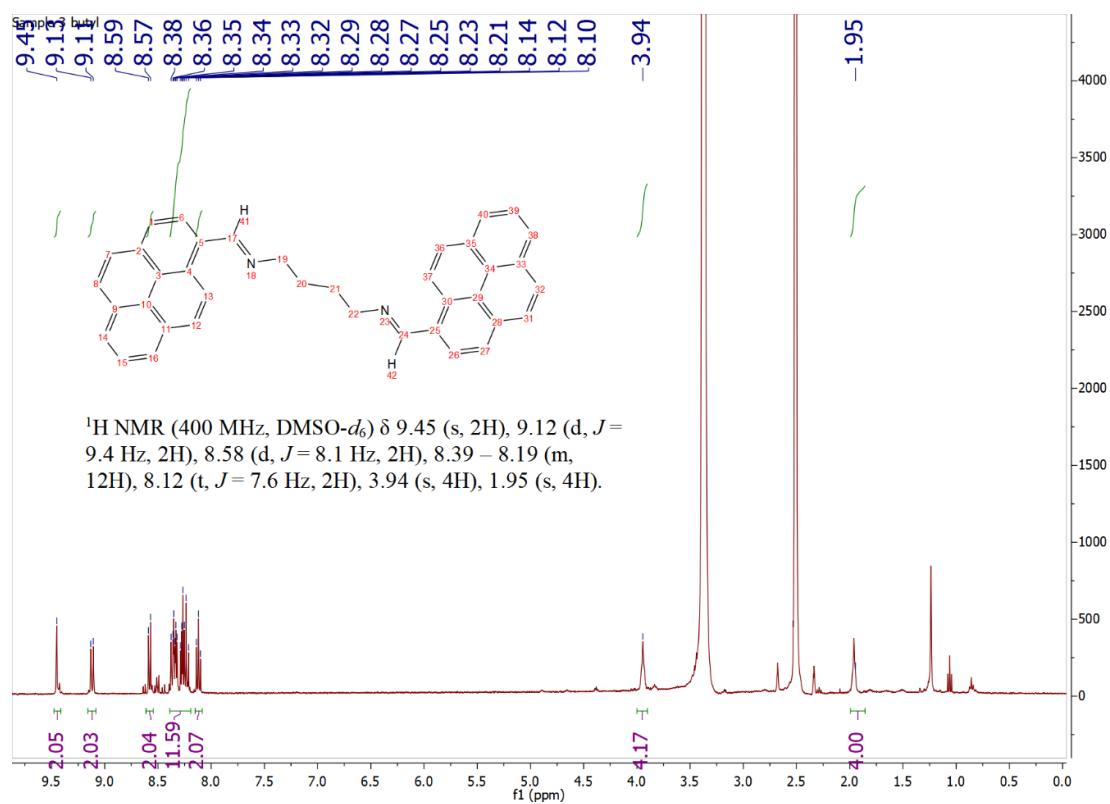

Figure S11: <sup>1</sup>H NMR spectrum of L4

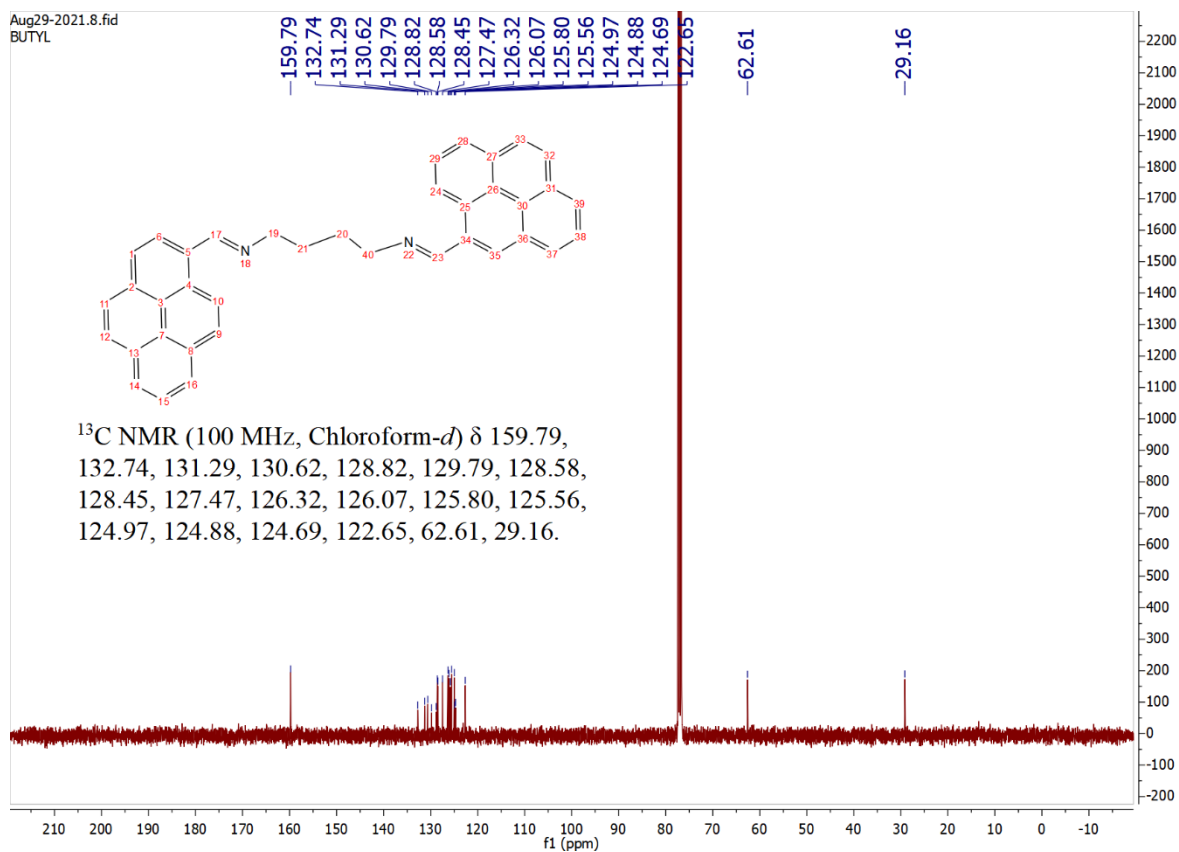

Figure S12: <sup>13</sup>C NMR spectrum of L4

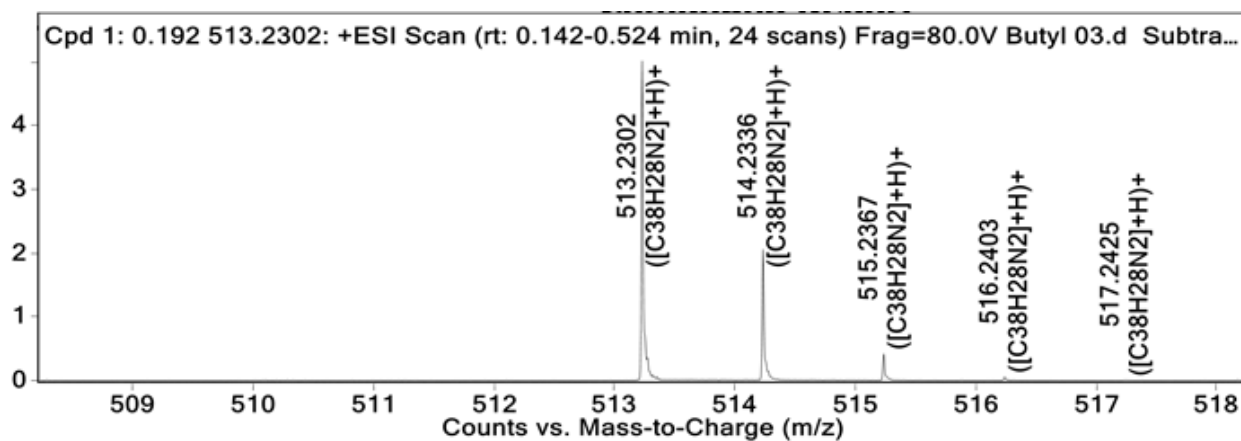

Figure S13: HRMS of L4

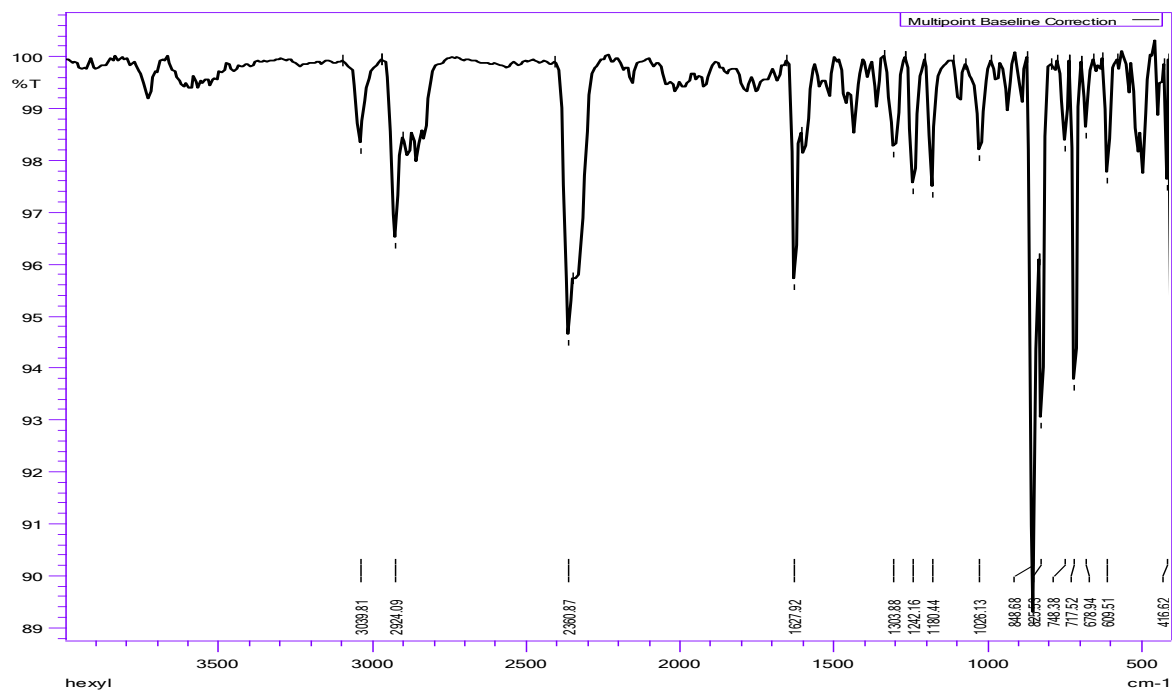

Figure S14: IR spectrum of L5

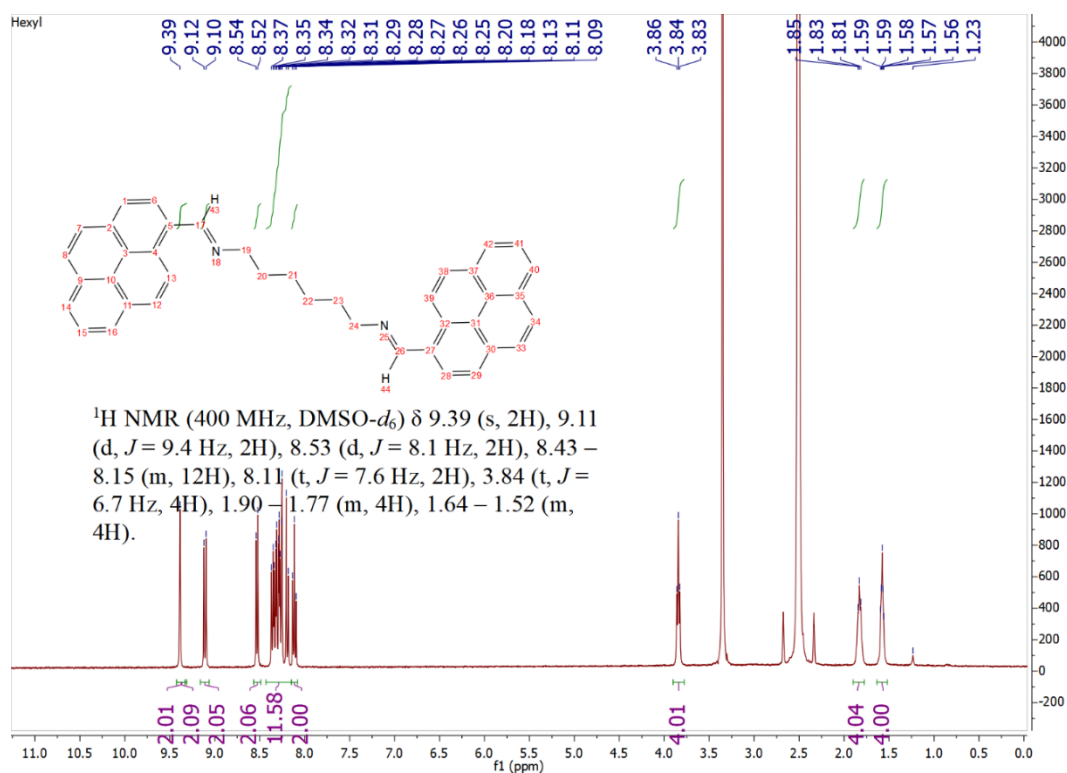

Figure S15:  $^1\text{H}$  NMR of L5

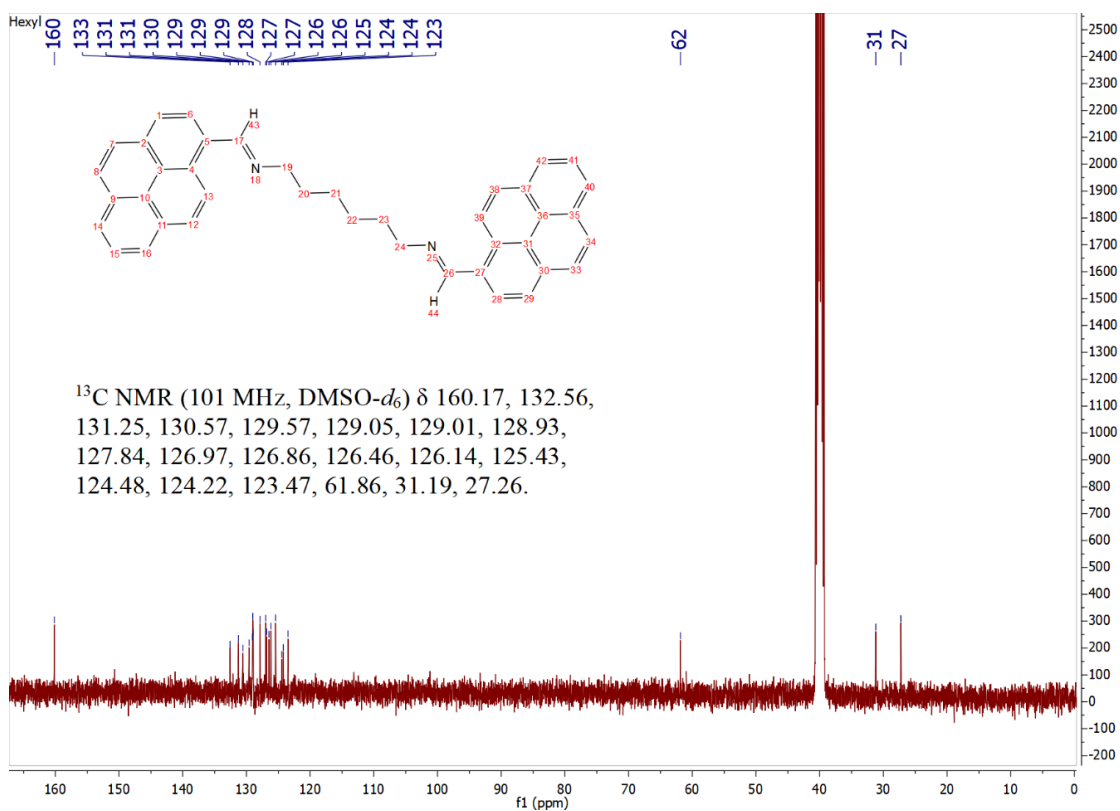

Figure S16:  $^{13}\text{C}$  NMR of L5

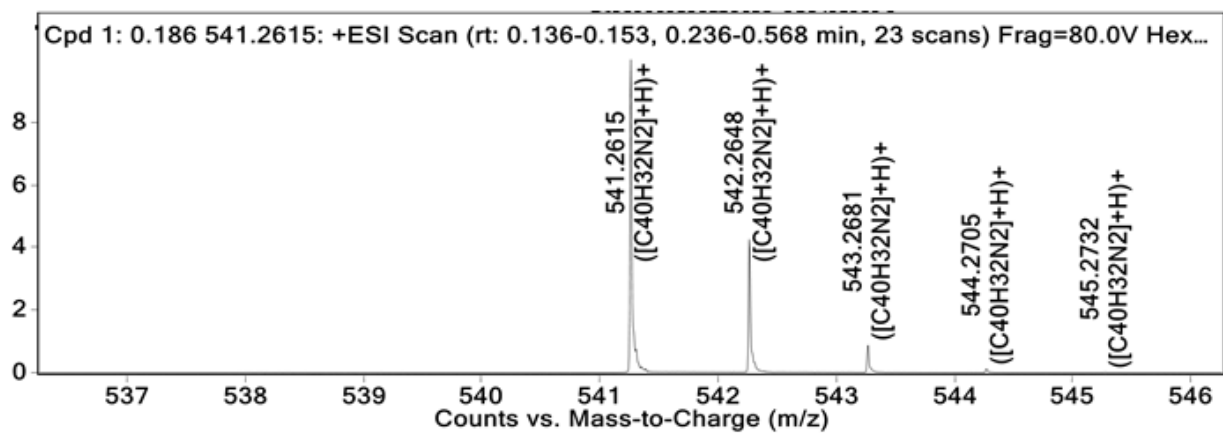

Figure S17: HRMS of L5

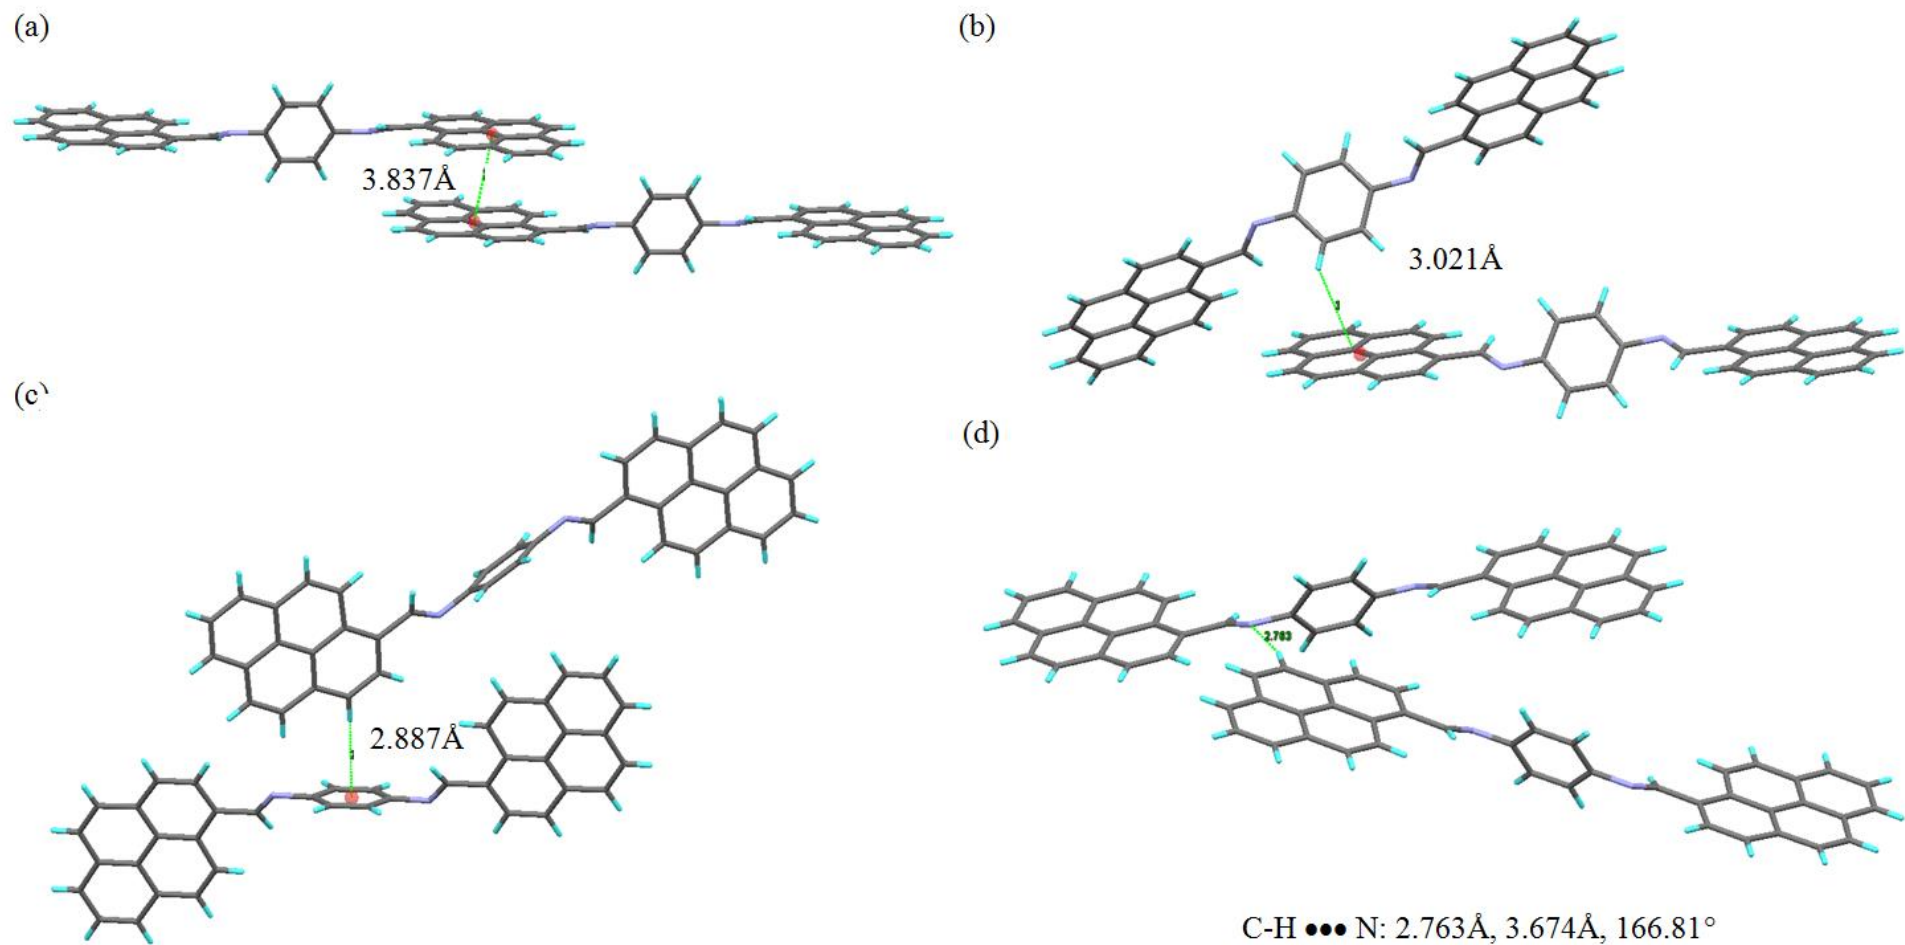

**Figure S18:** Illustrations of crystal structure of **L1**: (a) Aromatic  $\pi \cdots \pi$  interactions between pyrene groups of two neighbouring **L1** molecules; (b) Aromatic C-H $\cdots\pi$  interactions between phenyl C-H and pyrene group; (c) Aromatic C-H $\cdots\pi$  interactions between pyrene C-H and phenyl ring; (d) Very weak C-H $\cdots$ N interactions between pyrene C-H and imine N

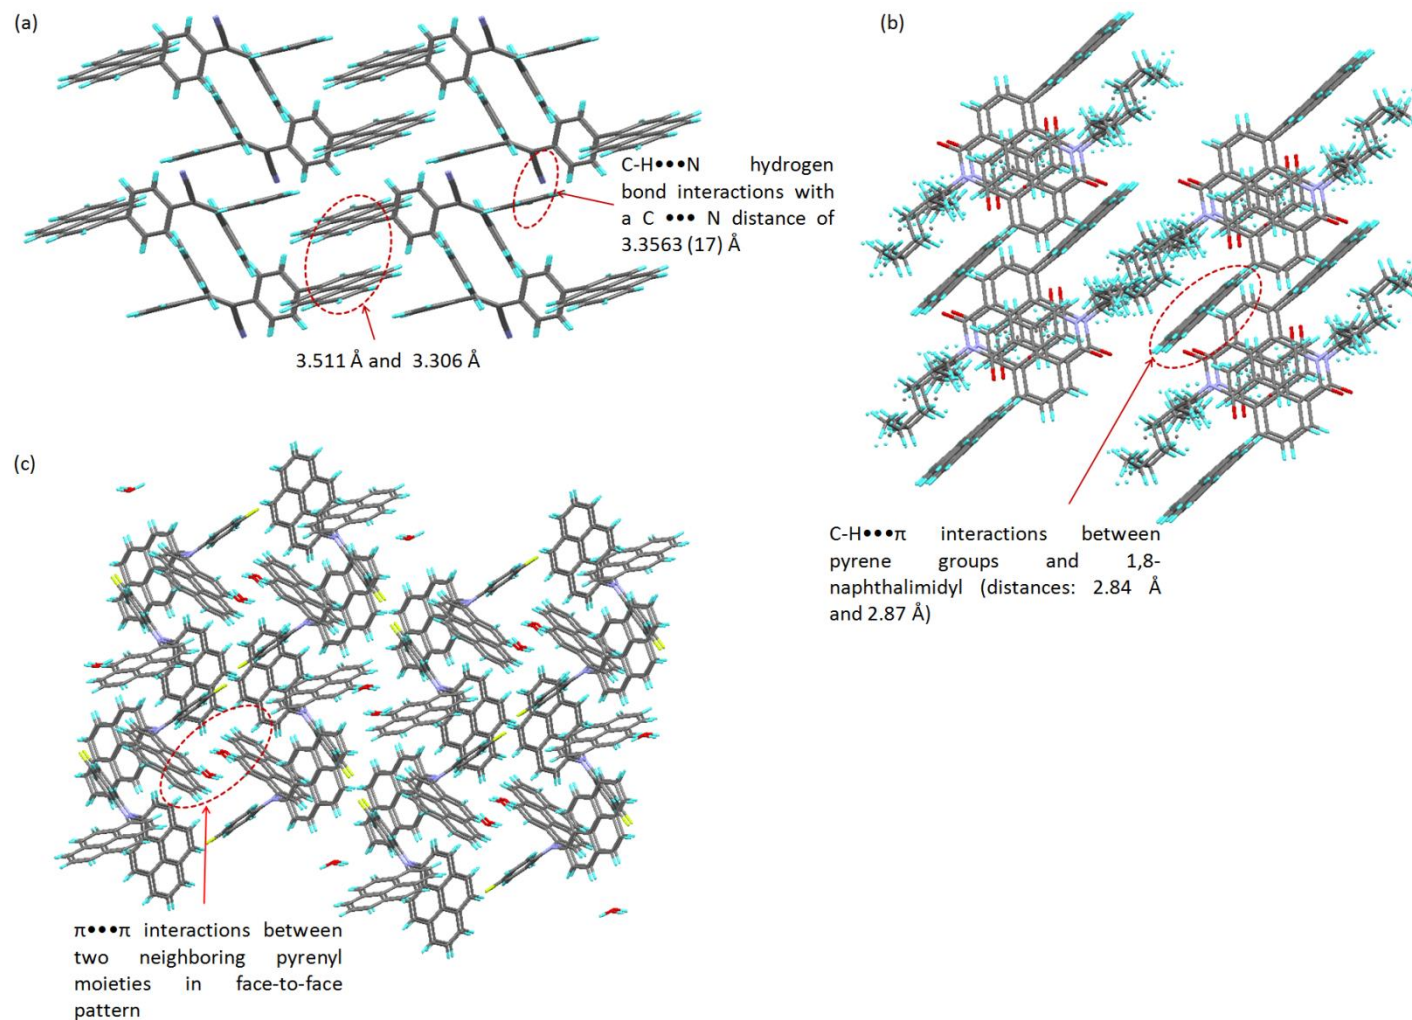

**Figure S19:** Literature reports on derivatives of pyrenes where aromatic interactions are responsible for holding the molecules together in the solid state; (a) Intermolecular  $\pi \cdots \pi$  interactions between adjacent pyrene ring systems in a pyrene based compound (CCDC: 1834096)<sup>5</sup>; (b), Molecules in pyrenyl substituted 1,8-naphthalimide are linked via aromatic C-H  $\cdots \pi$  interactions between the pyrene groups and 1,8-naphthalimidyl groups (CCDC 1830576)<sup>6</sup>; (c) Molecules in pyrenyl-based triaryl amines are linked together by  $\pi \cdots \pi$  interactions (CCDC 1056680)<sup>7</sup>

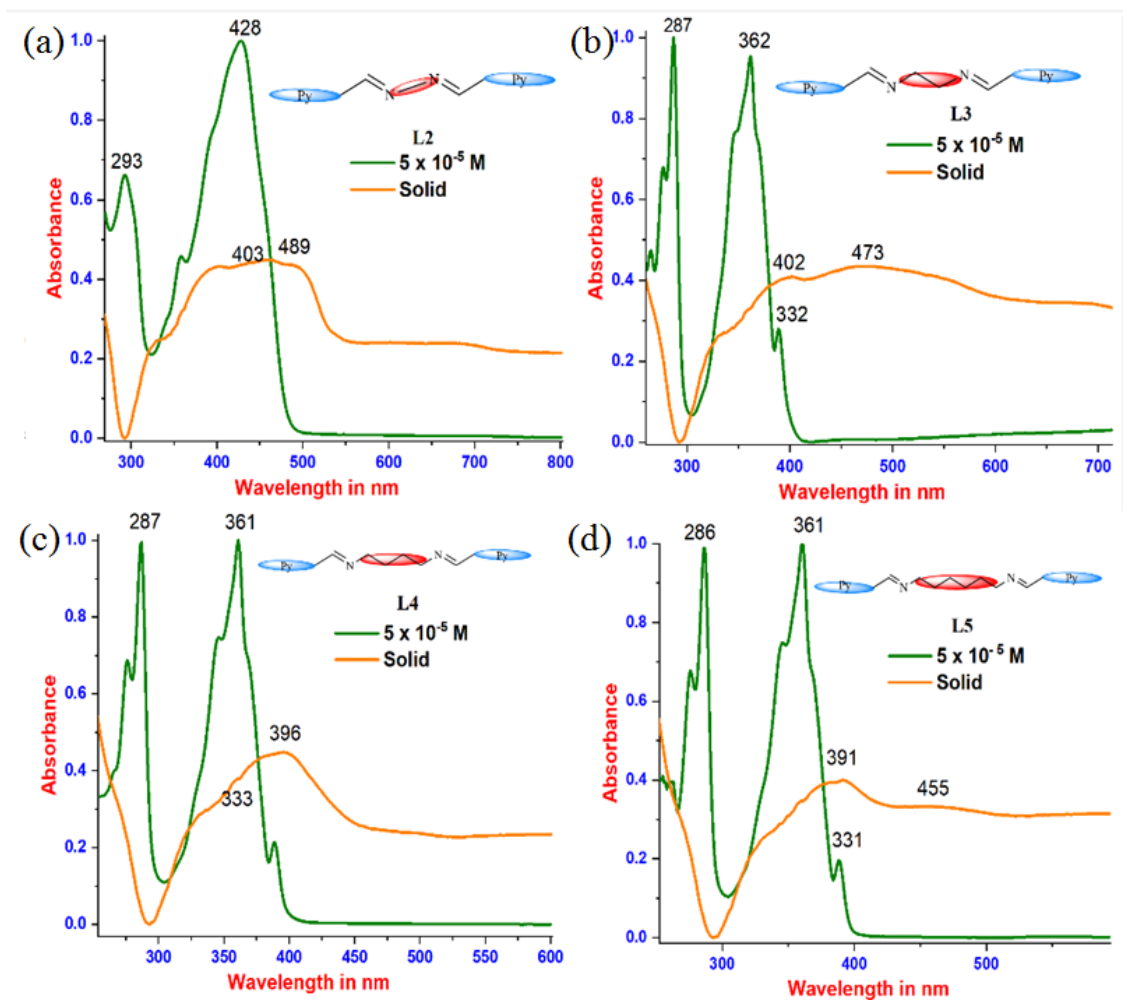

**Figure S20:** UV-Visible spectra in DMF and solid-state (in BaSO<sub>4</sub>): (a) L2; (b) L3; (c) L4; (d) L5

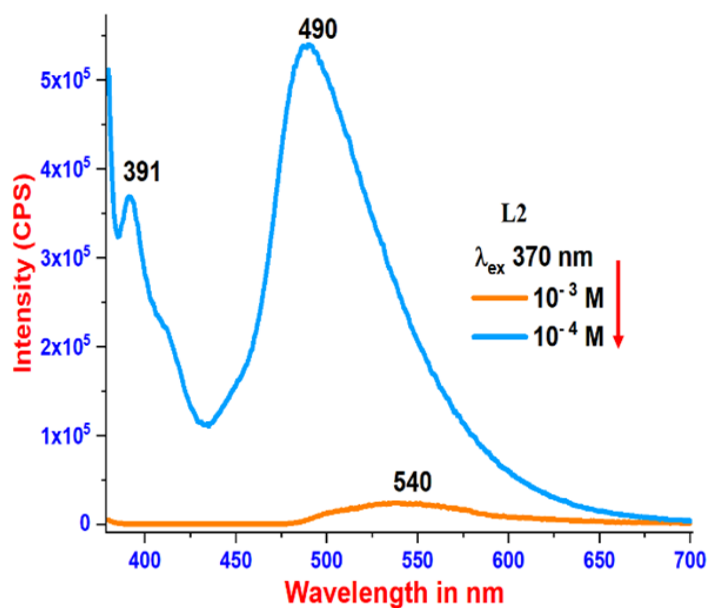

**Figure S21:** PL spectra of L2 (excitation wavelength 370 nm) in DMF at different concentrations (slit width 10 nm)



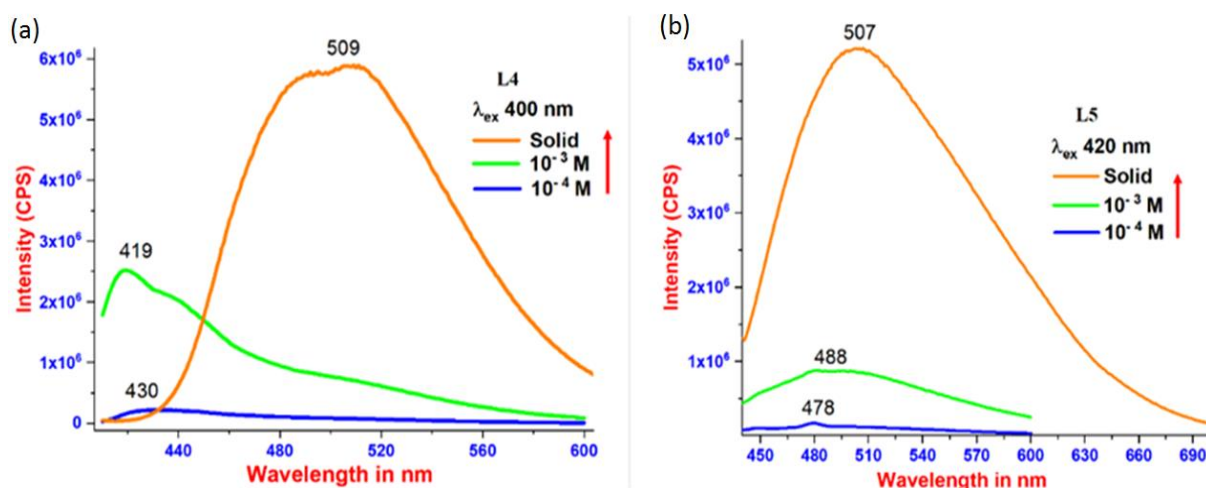

**Figure S22:** PL spectra of (a) **L4** (excitation wavelength 400 nm) and (b) **L5** (excitation wavelength 420 nm) in DMF at different concentrations and in solid state

**Table S1:** Comparison of published melting points and the spectroscopy data with the compounds synthesized in the current work

| Compounds | Melting Point (Current work) | Melting Point (Literature)                     | <sup>1</sup> H-NMR (Current workt)                                                                                                                | <sup>1</sup> H-NMR (Literature)                                                         | <sup>13</sup> C-NMR (Current work)                                                                                                                     | <sup>13</sup> C-NMR (Literature)                             |
|-----------|------------------------------|------------------------------------------------|---------------------------------------------------------------------------------------------------------------------------------------------------|-----------------------------------------------------------------------------------------|--------------------------------------------------------------------------------------------------------------------------------------------------------|--------------------------------------------------------------|
| <b>L1</b> | 315 - 316 °C                 | [317 °C] <sup>2</sup>                          | 9.80 (2H, s, imine CH), 9.37 (2H, d, <i>J</i> = 9.4 Hz, ArH), 8.88 (2H, d, <i>J</i> = 8.1 Hz, ArH), 8.55 – 8.13 (14H, br, ArH), 7.71 (4H, s, ArH) | [9.78 (s, 2H, CH_N), 9.35 (d, 2HAr), 8.86 (d, 2HAr), 8.44–8.16 (m, 18HAr)] <sup>2</sup> | 150.24, 133.43, 131.19, 130.56, 130.16, 130.15, 129.43, 128.59, 127.69, 127.65, 127.23, 126.87, 125.43, 125.30, 124.43, 124.36, 123.76, 123.38, 115.10 | -                                                            |
| <b>L2</b> | 308-309 °C                   | [308 °C] <sup>2</sup><br>[311 °C] <sup>4</sup> | 9.94 (2H, s, imine CH), 9.30 (2H, d, <i>J</i> = 9.2 Hz,                                                                                           | [9.94 (s, 2H, CH_N), 9.03 (d, 2HAr),                                                    | 150.89, 133.19, 131.28, 130.65, 129.93,                                                                                                                | (159.3<br>132.4<br>130.4 129.9<br>129.3 128.4<br>126.7 128.3 |

|           |                 |                       |                                                                                                                                                                                                                                                                                  |                                                                                                                     |                                                                                                                                                                                                            |                                                                                    |
|-----------|-----------------|-----------------------|----------------------------------------------------------------------------------------------------------------------------------------------------------------------------------------------------------------------------------------------------------------------------------|---------------------------------------------------------------------------------------------------------------------|------------------------------------------------------------------------------------------------------------------------------------------------------------------------------------------------------------|------------------------------------------------------------------------------------|
|           |                 |                       | ArH),<br>8.86 (2H,<br>d, $J = 8.0$<br>Hz, ArH),<br>8.53 – 8.42<br>(6H, m,<br>ArH), 8.41<br>– 8.28 (6H,<br>m, ArH),<br>8.19 (2H,<br>t, $J = 7.7$<br>Hz, ArH)                                                                                                                      | 8.85 (d,<br>2HAr),<br>8.30–8.08<br>(m,<br>14HAr)] <sup>2</sup>                                                      | 129.84,<br>129.44,<br>128.55,<br>127.73,<br>127.51,<br>127.05,<br>126.69,<br>125.38,<br>124.99,<br>124.74,<br>124.46,<br>123.89                                                                            | 126.4 126.6<br>126.2<br>125.9 125.6<br>125.4 124.4<br>123.8<br>122.8) <sup>8</sup> |
| <b>L3</b> | 225 - 226<br>°C | [225 °C] <sup>3</sup> | 9.35 (2H,<br>s, imine<br>CH), 8.71<br>(2H, d, $J =$<br>9.3 Hz,<br>ArH), 8.54<br>(2H, d, $J =$<br>8.0 Hz,<br>ArH), 8.23<br>– 7.77<br>(14H, m,<br>ArH), 4.38<br>(4H, s,<br>2×CH <sub>2</sub> )                                                                                     | [4.35 (4H,<br>s, CH <sub>2</sub> ), d<br>7.76–8.68<br>(18H, m,<br>pyrene), d<br>9.32 (2H,<br>s, HC=N)] <sup>3</sup> | 162.43,<br>135.58,<br>131.43,<br>131.13,<br>130.99,<br>130.88,<br>130.75,<br>130.47,<br>127.47,<br>127.24,<br>127.09,<br>126.87,<br>126.60,<br>124.73,<br>124.59,<br>124.12,<br>123.07,<br>47.34           | -                                                                                  |
| <b>L4</b> | 231-232<br>°C   | [230 °C] <sup>4</sup> | 9.45 (2H,<br>s, imine<br>CH), 9.12<br>(2H, d, $J =$<br>9.4 Hz,<br>ArH), 8.58<br>(2H, d, $J =$<br>8.1 Hz,<br>ArH), 8.39<br>– 8.19<br>(12H, m,<br>ArH), 8.12<br>(2H, t, $J =$<br>7.6 Hz,<br>ArH), 3.94<br>(4H, br,<br>2×CH <sub>2</sub> ),<br>1.95 (4H,<br>br, 2×CH <sub>2</sub> ) |                                                                                                                     | 159.79,<br>132.74,<br>131.29,<br>130.62,<br>128.82,<br>129.79,<br>128.58,<br>128.45,<br>127.47,<br>126.32,<br>126.07,<br>125.80,<br>125.56,<br>124.97,<br>124.88,<br>124.69,<br>122.65,<br>62.61,<br>29.16 | -                                                                                  |
| <b>L5</b> | 153-154         | [150 °C] <sup>4</sup> | 9.39 (2H,                                                                                                                                                                                                                                                                        |                                                                                                                     | 160.17,                                                                                                                                                                                                    | -                                                                                  |

|  |    |  |                                                                                                                                                                                                                                                                                                                                   |  |                                                                                                                                                                                                           |  |
|--|----|--|-----------------------------------------------------------------------------------------------------------------------------------------------------------------------------------------------------------------------------------------------------------------------------------------------------------------------------------|--|-----------------------------------------------------------------------------------------------------------------------------------------------------------------------------------------------------------|--|
|  | °C |  | s, imine<br>CH), 9.11<br>(2H, d, $J =$<br>9.4 Hz,<br>ArH), 8.53<br>(2H, d, $J =$<br>8.1 Hz,<br>ArH), 8.43<br>– 8.15<br>(12H, br,<br>ArH), 8.11<br>(2H, t, $J =$<br>7.6 Hz,<br>ArH), 3.84<br>(4H, br,<br>2×CH <sub>2</sub> ),<br>1.90 – 1.77<br>(4H, br,<br>2×CH <sub>2</sub> ),<br>1.64 – 1.52<br>(4H, br,<br>2×CH <sub>2</sub> ) |  | 132.56,<br>131.25,<br>130.57,<br>129.57,<br>129.05,<br>129.01,<br>128.93,<br>127.84,<br>126.97,<br>126.86,<br>126.46,<br>126.14,<br>125.43,<br>124.48,<br>124.22,<br>123.47,<br>61.86,<br>31.19,<br>27.26 |  |
|--|----|--|-----------------------------------------------------------------------------------------------------------------------------------------------------------------------------------------------------------------------------------------------------------------------------------------------------------------------------------|--|-----------------------------------------------------------------------------------------------------------------------------------------------------------------------------------------------------------|--|

#### References:

1. G. M. Sheldrick, *Acta Crystallographica Section C: Structural Chemistry*, 2015, **71**, 3-8.
2. D. Sęk, M. Siwy, J. G. Małecki, S. Kotowicz, S. Golba, E. M. Nowak, J. Sanetra and E. Schab-Balcerzak, *Spectrochimica Acta Part A: Molecular and Biomolecular Spectroscopy*, 2017, **175**, 168-176.
3. M. Kumar, A. Dhir, V. Bhalla, R. Sharma, R. K. Puri and R. K. Mahajan, *Analyst*, 2010, **135**, 1600-1605.
4. D. Braun and R. Langendorf, *Journal für praktische Chemie*, 1999, **341**, 128-137.
5. B.-X. Miao, X.-X. Tang and L.-F. Zhang, *Acta Crystallographica Section E: Crystallographic Communications*, 2018, **74**, 638-641.
6. O. Bezikonny, D. Gudeika, D. Volyniuk, J. V. Grazulevicius and G. Bagdziunas, *New Journal of Chemistry*, 2018, **42**, 12492-12502.
7. R. Zhang, Y. Zhao, G. Li, D. Yang and Z. Ni, *RSC Advances*, 2016, **6**, 9037-9048.
8. R. Martínez, A. Espinosa, A. Tárraga and P. Molina, *Organic letters*, 2005, **7**, 5869-5872.
